# Supplementary material for: Proteolytic cleavage of Beclin 1 exacerbates neurodegeneration
Source: Springer Nature journal article supplement (doi:10.1186/s13024-018-0302-4), 2018-12-01
Supplement: MOESM1 [file 16362896]

# Supplementary Figure S1

**a**

Beclin LacZ-Reporter

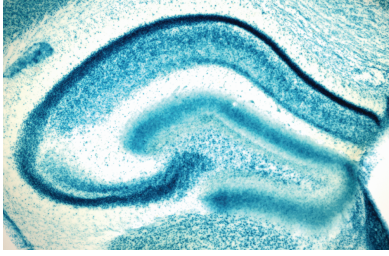

**b**

WT

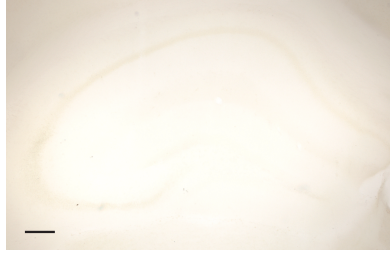

**c**

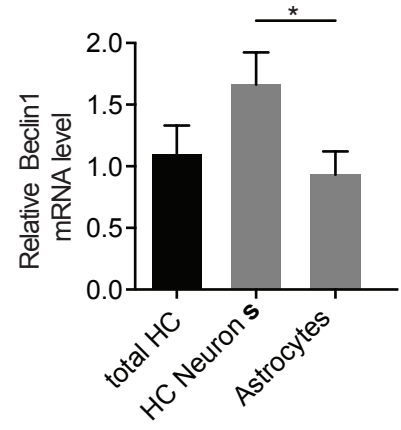

**Supplementary Figure S1: Beclin 1 expression in the mouse hippocampus.**

**a,b**  $\beta$ -Galactosidase activity assay was performed on Beclin 1 reporter mice expressing LacZ under the endogenous Beclin 1 locus. Representative hippocampal image of  $\beta$ -Galactosidase labeling of LacZ reporter (**a**) and WT littermate controls (**b**).  $\beta$ -Galactosidase expression was detected in the pyramidal cell layer in the hippocampal CA1 region of reporter mice but not WT mice (scale bar: 200 $\mu$ m) **c** Quantitative RT-PCR analysis of Beclin 1 expression in RNA isolated from hippocampi of adult 2 months old mice, primary hippocampal neuron and astrocyte cultures (n = 5 hippocampi, n = 8 for primary cultures). Data expressed as mean + SEM; \*p < 0.05; compared by one-way ANOVA with a Tukey's post test for multiple comparisons.
