# Supplementary material for: Proteolytic cleavage of Beclin 1 exacerbates neurodegeneration
Source: Springer Nature journal article supplement (doi:10.1186/s13024-018-0302-4), 2018-12-01
Supplement: MOESM8 [file 16362896]

# Supplementary Figure S8

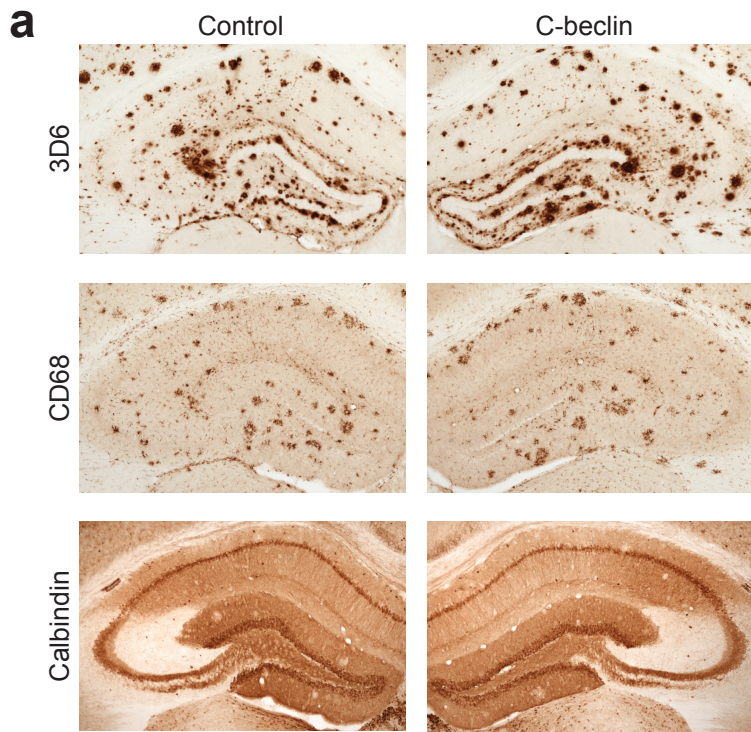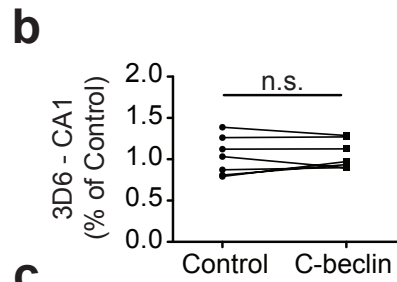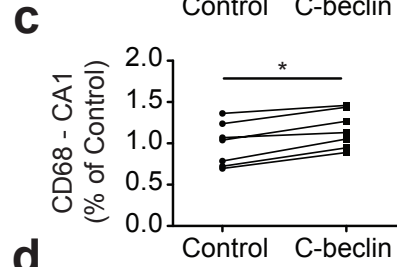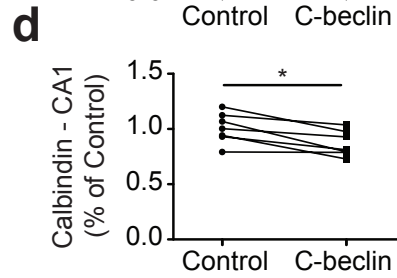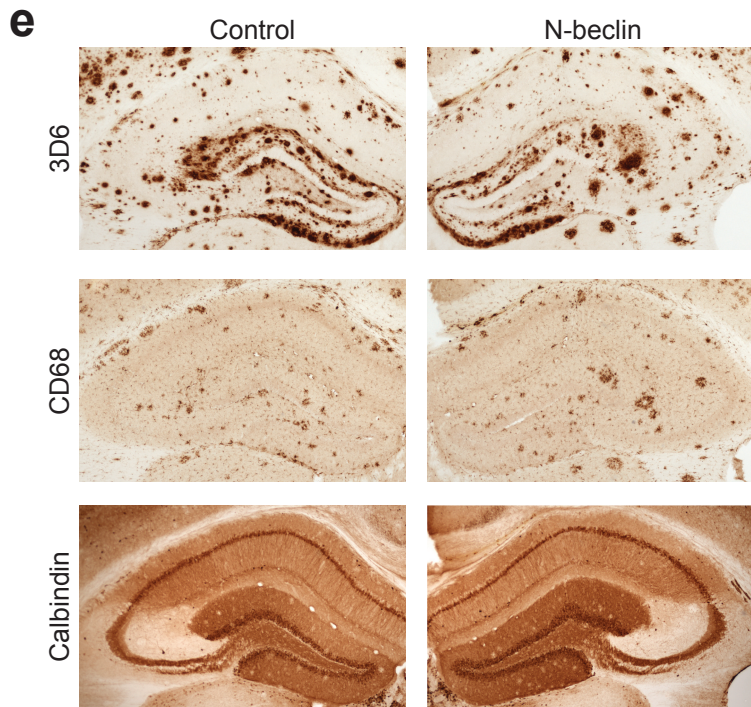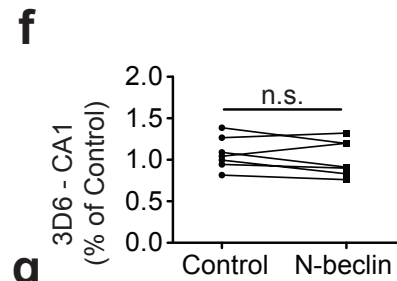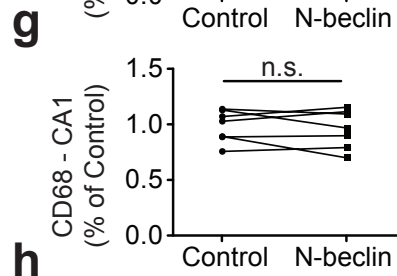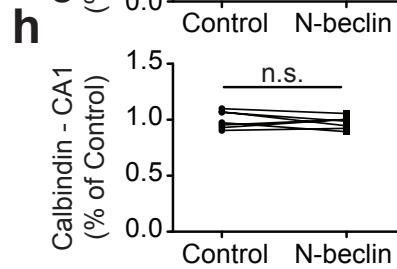

**Supplementary Figure S8: C-Beclin expression exacerbates degeneration in a hAPP mouse model.**

a 6 months old hAPP-transgenic mice were stereotaxically injected with C-beclin into the CA1 of the hippocampus and control AAV at the same site into the contralateral hemisphere. Amyloid beta ( $A\beta$ ) pathology and associated degenerative phenotypes were assessed by immunohistochemical detection of  $A\beta$  (using the 3D6 antibody (top panel), microglial activation marker CD68 (middle panel) and neuronal marker Calbindin (lower panel). Representative hippocampal images from adjacent sections of one animal expressing C-beclin fragments (right hemisphere) or control (left hemisphere). Scale bar 200 $\mu$ m. **b-d** Quantification of 3D6 (**b**), CD68 (**c**) and Calbindin (**d**) immunostaining in the CA1 area of the hippocampus. Comparison of C-beclin to the contralateral control hemisphere (n=7 mice/group; 4-5 hippocampal sections/brain). **e** 6 months old hAPP-transgenic mice were stereotaxically injected with N-beclin into the CA1 of the hippocampus and control AAV at the same site into the contralateral hemisphere. Amyloid beta ( $A\beta$ ) pathology and associated degenerative phenotypes were assessed by immunohistochemical detection of  $A\beta$  (using the 3D6 antibody (top panel), microglial activation marker CD68 (middle panel) and neuronal marker Calbindin (lower panel). Representative hippocampal images from adjacent sections of one animal expressing N-beclin fragments (right hemisphere) or control (left hemisphere). Scale bar 200 $\mu$ m. **f-h** Quantification of 3D6 (**f**), CD68 (**g**) and Calbindin (**h**) immunostaining in the CA1 area of the hippocampus. Comparison of N-beclin to the contralateral control hemisphere (n=7 mice/group; 4-5 hippocampal sections/brain). Data expressed as mean value for each hemisphere of the same animal; \*p < 0.05; compared by paired Student's t-test.
